# Supplementary material for: Comprehensive assessment of multimorbidity burden in a population-based cohort of patients with rheumatoid arthritis
Source: HighWire-hosted journal article supplement (doi:10.1136/rmdopen-2021-002022), 2022-01-01
Supplement: rmdopen-2021-002022supp001_data_supplement.pdf [file rmdopen-2021-002022supp001_data_supplement.pdf]

Supplemental Table 1. Diagnostic codes used for identification of chronic conditions included in recommended list for investigation of multimorbidity in patients with rheumatoid arthritis.

| Morbidity                    | ICD-9-CM codes                                                                                                                                  | ICD-10-CM codes                                                                                                                                                                      |
|------------------------------|-------------------------------------------------------------------------------------------------------------------------------------------------|--------------------------------------------------------------------------------------------------------------------------------------------------------------------------------------|
| Alcohol abuse                | 265.2, 291.1, 291.2, 291.3, 291.5, 291.81, 291.82, 291.89, 291.9, 303.x, 305.0x, 357.5, 425.5, 535.3x, 571.0, 571.1, 571.2, 571.3, 980.x, V11.3 | E52, F10.x, G62.1, I42.6, K29.2x, K70.x, T51.x, Z71.51                                                                                                                               |
| Anemia                       | 280.x, 281.x, 282.x, 283.x, 284.x, 285.x                                                                                                        | D5x.x, D60.x, D61.x, D62.x, D63.x, D64.x                                                                                                                                             |
| Anxiety                      | 293.84, 300.x (not including 300.4), 308.x                                                                                                      | F40.x, F41.x, F42.x, F43.0, F44.x, F45.x, F48.x                                                                                                                                      |
| Asthma                       | 493.x* (not including 493.81)                                                                                                                   | J45.x* (not including J45.990)                                                                                                                                                       |
| Bipolar disorder             | 296.0x, 296.1x, 296.4x, 296.5x, 296.6x, 296.7, 296.8x                                                                                           | F30.x, F31.x                                                                                                                                                                         |
| Benign prostatic hyperplasia | 600.x                                                                                                                                           | N40.x                                                                                                                                                                                |
| Cancer                       | 14x.x, 15x.x, 16x.x, 17x.x* (not including 173.x), 18x.x, 19x.x, 20x.x* (not including 209.x), V10.6x, V10.7x                                   | Cxx.x* (not including C44.x, C7A.x, or C7B.x), Z85.6, Z85.7x                                                                                                                         |
| Cancer (solid)               | 200.x, 201.x, 202.0x, 202.1x, 202.4x, 202.7x, 202.8x, 202.9x, 203.x, 204.x, 205.x, 206.x, 207.x, 208.x                                          | C0x.x-C7x.x (not including C44.x, C4A.x), D0x.x (not including D04.x, D06.x), D43.x, D45, D47.2, D47.3, D47.4, D47.Z1, D47.Z2, D49.6, E31.22, E31.23, J91.0, R18.0, R85.614, R87.624 |
| Cancer (hematologic)         | 14x.x, 15x.x, 16x.x, 17x.x* (not including 173.x), 18x.x, 19x.x, 202.3x, 202.5x, 202.6x, 209.0x, 209.1x, 209.2x, 209.3x,                        | C8x.x (not including C80.x), C90.x-C95.x (not including C94.40, C94.42, C94.6)                                                                                                       |

|                                        |                                                                                                                                               |                                                                                                                                                                    |
|----------------------------------------|-----------------------------------------------------------------------------------------------------------------------------------------------|--------------------------------------------------------------------------------------------------------------------------------------------------------------------|
|                                        | 209.7x, 230.x, 231.x, 233.x (not including 233.1), 234.x, 237.5, 237.7x, 237.9, 238.77, 239.6, 258.02, 258.03, 511.81, 789.51, 795.16, 796.76 |                                                                                                                                                                    |
| Cardiac arrhythmia                     | 426.0, 426.10, 426.12, 426.13, 426.7, 426.9, 427.x* (not including 427.5), 785.0, 996.01, 996.04, V45.0x, V53.3x                              | I44.2, I44.3x, I44.1, I45.6, I45.9, I47.x, I48.x, I49.x, R00.0, T82.110x, T82.111x, T82.120x, T82.121x, T82.190x, T82.191x, Z95.0, Z95.810, Z95.818, Z95.9, Z45.0x |
| Cerebrovascular disease                | 362.34, 43x.x (not including 437.3)                                                                                                           | H34.x, I6x.x (not including I67.1)                                                                                                                                 |
| Chronic back pain                      | 720.x* (not including 720.0), 721.x, 722.x, 723.x, 724.x                                                                                      | M46.x, M47.x, M48.x, M49.x, M50.x, M51.x, M53.x, M54.x                                                                                                             |
| Congestive heart failure               | 398.91, 402.x1, 404.x1, 404.x3, 425.4, 425.7, 425.8, 425.9, 428.x                                                                             | I09.81, I11.0, I13.0, I13.2, I42.5, I42.7, I43, I50.x                                                                                                              |
| Chronic obstructive pulmonary disorder | 491.x, 492.x, 496.x                                                                                                                           | J41.x, J43.x, J44.9                                                                                                                                                |
| Coronary artery disease                | 410.x, 411.x, 412.x, 413.x, 414.x, 429.7x, V45.81, V45.82                                                                                     | I20.x, I21.x, I22.x, I23.x, I24.x, I25.x, I51.0, Z95.1, Z98.61                                                                                                     |
| Dementia                               | 290.x, 294.1x, 331.2                                                                                                                          | F01.x, F02.x, F03.x, G31.1                                                                                                                                         |
| Depression                             | 296.2x, 296.3x, 300.4, 309.x (not including 309.81), 311                                                                                      | F32.x, F33.x, F34.1, F43.x (not including F43.1x)                                                                                                                  |
| Diabetes mellitus                      | 250.x                                                                                                                                         | E08.x, E09.x, E10.x, E11.x, E13.x                                                                                                                                  |
| Diverticular disease                   | 562.x                                                                                                                                         | K57.x                                                                                                                                                              |

|                                 |                                                                                                                                   |                                                                                                                         |
|---------------------------------|-----------------------------------------------------------------------------------------------------------------------------------|-------------------------------------------------------------------------------------------------------------------------|
| Drug abuse                      | 292.x, 304.x, 305.2x, 305.3x, 305.4x,<br>305.5x, 305.6x, 305.7x, 305.8x, 305.9x,<br>V65.42                                        | F11.x, F12.x, F13.x, F14.x, F15.x, F16.x, F18.x,<br>F19.x, Z71.51                                                       |
| Fibromyalgia                    | 729.1                                                                                                                             | M79.1x, M79.7                                                                                                           |
| Gastroesophageal reflux disease | 530.11, 530.81, 530.85                                                                                                            | K21.x, K22.7x                                                                                                           |
| Gout                            | 274.x                                                                                                                             | M10.x, M1A.x                                                                                                            |
| Headaches                       | 339.x, 346.x, 784.0                                                                                                               | G44.x, G43.x, R51                                                                                                       |
| Hearing loss                    | 389.x                                                                                                                             | H90.x, H91.x                                                                                                            |
| Hyperlipidemia                  | 272.0, 272.2, 272.3, 272.4                                                                                                        | E78.0x, E78.2, E78.3, E78.4x, E78.5                                                                                     |
| Hypertension                    | 401.x, 402.x (not including 402.x1), 403.x<br>(not including 403.x1), 404.0, 404.00,<br>404.1, 404.10, 404.9, 404.90 405.x        | I10.x, I11.9, I12.9, I13.10, I15.x, I16.x                                                                               |
| Hypothyroidism                  | 240.9, 243.x, 244.x, 246.1, 246.8                                                                                                 | E01.0, E01.2, E00.x, E03.0, E03.1, E01.8, E89.0,<br>E03.2, E03.3, E03.4, E03.8, E03.9, E02, E07.1,<br>E07.89            |
| Inflammatory skin disease       | 690.x, 694.x, 695.x, 696.x, 697.x, 698.x                                                                                          | L00, L10.x, L12.x, L13.x, L14, L21.x, L28.x, L29.x,<br>L30.3, L4x.x, L51.x, L52.x, L53.x, L54.x, L71.x, L93.x,<br>L98.1 |
| Interstitial lung disease       | 515, 516.3x, 516.8, 516.9, 714.81, 714.89                                                                                         | J84.1x, J84.2, J84.09, J84.9, M05.1x, M06.4                                                                             |
| Liver disease                   | 070.22, 070.23, 070.32, 070.33, 070.44,<br>070.54, 070.6, 070.9, 456.0, 456.1, 456.2x,<br>570, 571.4x, 571.5-571.9, 572.2, 572.3, | B18.x, I85.x, K71.x, K72.x, K73.x, K76.2, K76.3,<br>K76.4, K76.5, K76.6, K76.7, K76.89, K76.9, Z94.4                    |

|                                        |                                                                                                                        |                                                                                                                                                        |
|----------------------------------------|------------------------------------------------------------------------------------------------------------------------|--------------------------------------------------------------------------------------------------------------------------------------------------------|
|                                        | 572.4, 572.8, 573.3, 573.4, 573.8, 573.9,<br>V42.7                                                                     |                                                                                                                                                        |
| Neuropathy                             | 350.x, 351.x, 352.x, 353.x, 354.x, 355.x,<br>356.x, 357.x (not including 357.5)                                        | G5x.x, G6x.x (not including G62.1)                                                                                                                     |
| Non-inflammatory gynecologic disorders | 618.x, 620.x, 621.x, 622.x, 623.x, 624.x,<br>626.x, 627.x                                                              | N81.x, N83.x, N84.x, N85.x, N86, N87.x, N88.x,<br>N89.x, N90.x, N91.x, N92.x, N93.x, N95.x                                                             |
| Obesity                                | 278.0x                                                                                                                 | E66.x                                                                                                                                                  |
| Osteoarthritis                         | 715.x, V13.4                                                                                                           | M15.x, M16.x, M17.x, M18.x, M19.x                                                                                                                      |
| Osteoporosis                           | 733.0x                                                                                                                 | M80.x, M81.x                                                                                                                                           |
| Parkinson's disease                    | 332.x                                                                                                                  | G20, G21.x                                                                                                                                             |
| Pulmonary circulation disorder         | 415.x, 416.x, 417.0, 417.8, 417.9                                                                                      | I26.x, I27.x, I28.0, I28.8, I28.9                                                                                                                      |
| Peptic ulcer disease                   | 531.x, 532.x, 533.x, 534.x                                                                                             | K25.x, K26.x, K27.x, K28.x                                                                                                                             |
| Peripheral vascular disease            | 093.0, 437.3, 440.x, 441.x, 443.1, 443.2x,<br>443.81, 443.82, 443.89, 443.9, 447.1,<br>557.1, 557.9, V43.4             | A52.01, I67.1, I70.x, I71.x, I73.1, I77.7x, I73.81,<br>I73.89, I73.9, I77.1, K55.1, K55.8, K55.9, Z95.82x                                              |
| Post-traumatic stress disorder         | 309.81                                                                                                                 | F43.1x                                                                                                                                                 |
| Renal disease                          | 403.x1, 404.x2, 404.x3, 582.x, 583.0,<br>583.1, 583.2, 583.4, 583.6, 583.7, 585.x,<br>586, 588.0, V42.0, V45.1x, V56.x | I12.0, I13.11, I13.2, N03.x, N08, N05.2, N05.3, N05.4,<br>N05.5, N05.9, N17.1, N17.2, N18.x, N19, N25.0,<br>Z94.0, Z99.2, Z91.15, Z49.x                |
| Severe vision reduction                | 361.x, 362.x (not including 362.34), 363.8,<br>363.9, 365.x, 366.x, 369.x, 370.x, 377.x*<br>(not including 377.3x)     | E08.3x* (not including E08.37x), E09.3x* (not<br>including E09.37x), E10.3x* (not including E10.37x),<br>E11.3x* (not including E11.37x), E13.3x* (not |

|                                                                           |                                                                                                  |                                                                                                                                                                                                                                                                                                                                                          |
|---------------------------------------------------------------------------|--------------------------------------------------------------------------------------------------|----------------------------------------------------------------------------------------------------------------------------------------------------------------------------------------------------------------------------------------------------------------------------------------------------------------------------------------------------------|
|                                                                           |                                                                                                  | including E13.37x), H16.x, H25.x, H26.x, H28, H31.8, H31.9, H33.x, H35.x, H40.x, H42, H47.x, H54.x                                                                                                                                                                                                                                                       |
| Sleep disorders, inorganic                                                | 307.4x, 780.5x                                                                                   | F51.x, G47.0x, G47.1x, G47.2x, G47.8                                                                                                                                                                                                                                                                                                                     |
| Urinary incontinence                                                      | 788.3x                                                                                           | R32, N39.3, N39.4x                                                                                                                                                                                                                                                                                                                                       |
| Valvular heart disease                                                    | 093.2x, 394.x, 395.x, 396.x, 397.x, 424.x, 746.3, 746.4, 746.5, 746.6, V42.2, V43.3              | I05.x, I06.x, I07.x, I08.x, I09.1, I09.89, I09.9, I34.x, I35.x, I36.x, I37.x, I38, I39, Q23.0, Q23.1, Q23.2, Q23.3, Z95.3, Z95.2, Z95.4                                                                                                                                                                                                                  |
| Vitamin D deficiency and Other Nutritional Deficiencies (CCS52)           | 260, 261, 262, 263.x, 264.5, 268.x                                                               | E40, E41, E42, E43, E44.x, E45, E46, E50.5, E55.x, E64.0, E64.3, M83.x                                                                                                                                                                                                                                                                                   |
| Hypercalcemia and Other Nutritional/Endocrine/Metabolic Disorders (CCS58) | 270.x, 271.x, 272.5-272.9, 273.x, 275.x, 277.1-277.9 (not including 277.83, 277.88), 278.1-278.8 | D81.3, D81.5, D81.810, E20.1, E67.x, E68, E70.x (not including E70.81, E70.89), E71.x (not including E71.43), E72.x, E73.x, E74.x (not including E74.81x, E74.89), E75.21, E75.22, E75.24x, E75.3, E75.5, E75.6, E76.x, E77.x, E78.6, E78.70, E78.79, E78.8x, E78.9, E79.1-E79.9, E80.x, E83.x (not including E83.2), E85.x, E88.x (not including E88.3) |
| Thrombocytopenia and other Coagulation and Hemorrhagic Disorders (CCS62)  | 286.x, 287.1, 287.3x, 287.4, 287.5, 289.81, 289.82, 289.84                                       | D65, D66, D67, D68.x, D69.1, D69.3, D69.4x, D69.6, D75.82                                                                                                                                                                                                                                                                                                |
| Leukopenia and diseases of White Blood Cells (CCS63)                      | 288.x, 289.53                                                                                    | D70.x, D71, D72.0, D72.1, D72.8x, D72.9, D73.81, D76.x                                                                                                                                                                                                                                                                                                   |
| Restless legs and other nervous system conditions (CCS81)                 | 330.x, 331.3-331.9 (not including 331.82, 331.83), 333.x (not including 333.72,                  | E75.0x, E75.1x, E75.23, E75.25, E75.26, E75.29, E75.4, G10, G11.0, G11.1, G11.2-G11.9, G12.x,                                                                                                                                                                                                                                                            |

|                                                                      |                                                                                                                           |                                                                                                                                                                                 |
|----------------------------------------------------------------------|---------------------------------------------------------------------------------------------------------------------------|---------------------------------------------------------------------------------------------------------------------------------------------------------------------------------|
|                                                                      | 333.85, 333.92), 334.x, 335.x, 336.x, 337.x<br>(not including 337.2x)                                                     | G23.x, G24.09, G24.x (not including G24.01, G24.02),<br>G25.x, G26, G31.2, G31.8x (not including G31.83),<br>G31.9, G32.0, G32.81, G80.3, G90.0x, G90.3, G90.4,<br>G99.0, G99.2 |
| Chronic Sinusitis and Other Upper<br>Respiratory Infections (CCS126) | 473.x                                                                                                                     | J32.x                                                                                                                                                                           |
| Allergic Rhinitis and Other Upper<br>Respiratory Diseases (CCS134)   | 472.x, 476.x, 477.x, 478.11, 478.3x, V44.0,<br>V55.0                                                                      | J30.x (not including J30.5), J31.x, J34.81, J37.x,<br>J38.0x, Z43.0, Z93.0, Z96.3                                                                                               |
| Erectile dysfunction and other male<br>genital disorders (CCS166)    | 607.0, 607.3, 607.8x, 607.9                                                                                               | N42.83, N48.x (not including N48.1, N48.2x), N50.1,<br>N52.x                                                                                                                    |
| Chronic Skin Ulcers (CCS199)                                         | 707.x                                                                                                                     | L89.x (not including L89.x6, L89.xx6), L97.x, L98.4x                                                                                                                            |
| Acquired Foot Deformities<br>(CCS208)                                | 735.0-735.4                                                                                                               | M20.1x-M20.4x                                                                                                                                                                   |
| Sleep Apnea, Organic (CCS259<br>modified)                            | 327.00, 327.01, 327.09, 327.1X (not<br>including 327.15), 327.2X (not including<br>327.22), 327.4X, 327.51, 327.59, 327.8 | G47.0x, G47.1x, G47.3x (not including G47.32),<br>G47.5x, G47.61, G47.69, G47.8                                                                                                 |
